# Supplementary material for: Genetic Basis for Variation in Wheat Grain Yield in Response to Varying Nitrogen Application
Source: PLoS One. 2016 Jul 26;11(7):e0159374. doi: 10.1371/journal.pone.0159374 (PMC4961366; doi:10.1371/journal.pone.0159374)
Supplement: S1 Table — (DOCX) [file pone.0159374.s002.docx]

**Supporting Information**

**Genetic Basis for Variation in Wheat Grain Yield in Response to Varying Nitrogen Application**

Saba Mahjourimajd1, Julian Taylor 3, Beata Sznajder1, Andy Timmins1, Fahimeh Shahinnia1, #a, Zed Rengel4, Hossein Khabaz-Saberi4, Haydn Kuchel2, Mamoru Okamoto1*, Peter Langridge1*

1Australian Centre for Plant Functional Genomics (ACPFG), The University of Adelaide, PMB1, Glen Osmond, SA 5064, Australia

2Australian Grain Technologies, PMB1, Glen Osmond, SA 5064, Australia

3School of Agriculture, Food and Wine, Waite Research Institute, The University of Adelaide, PMB 1, Glen Osmond, SA 5064, Australia

4Soil Science and Plant Nutrition M087, School of Earth and Environment, University of Western Australia, 35 Stirling Highway, Crawley WA 6009, Australia

*Present address:*

#aCurrent Address:Leibniz-Institute of Plant Genetics and Crop Plant Research (IPK), Corrensstr. 3, 06466 Gatersleben, Germany

**S1 Table. Heritability analysis of the sites for grain yield (GY, kg ha-1) at varying nitrogen (N) treatments**

| **Site** | **N treatment**  **(kg ha-1)** | **Heritability** |
| --- | --- | --- |
| LAM 12 | 18 | 0.00 |
| LAM 12 | 52 | 0.18 |
| LAM 12 | 87 | 0.26 |
| PIN 11 | 0 | 0.75 |
| PIN 11 | 75 | 0.90 |
| PIN 11 | 150 | 0.87 |
| PIN 12 | 0 | 0.56 |
| PIN 12 | 75 | 0.71 |
| PIN 12 | 150 | 0.56 |
| YAN 11 | 0 | 0.50 |
| YAN 11 | 75 | 0.33 |
| YAN 11 | 150 | 0.39 |
| ED 13 | 0 | 0.71 |
| ED 13 | 60 | 0.78 |
| WH 13 | 0 | 0.73 |
| WH 13 | 35 | 0.78 |
